# Supplementary material for: Green preparation and characterization of a novel heat stabilizer for poly(vinyl chloride)–hydrocalumites
Source: Royal Society of Chemistry journal article supplement (doi:10.1039/c5ra03654b), 2015-01-01
Supplement: c5ra03654b1.pdf [file c5ra03654b1.pdf]

## Supporting Information

### Green Preparation and Characterization of a Novel Heat Stabilizer for Poly (vinyl chloride) - Hydrocalumites

5 Xing Wen, <sup>a,b</sup> Zhanhong Yang, <sup>\*a</sup> Jie Yan <sup>a,b</sup>, Xiaoe Xie <sup>a,b</sup>

<sup>a</sup> College of Chemistry and Chemical Engineering, Central South University, Changsha 410083, PR China.

<sup>b</sup> Innovation base of energy and chemical materials for graduate students training, Central South University, Changsha 410083, China

\* Corresponding autheor: [zhongnan320@gmail.com](mailto:zhongnan320@gmail.com)

10

15

20

25

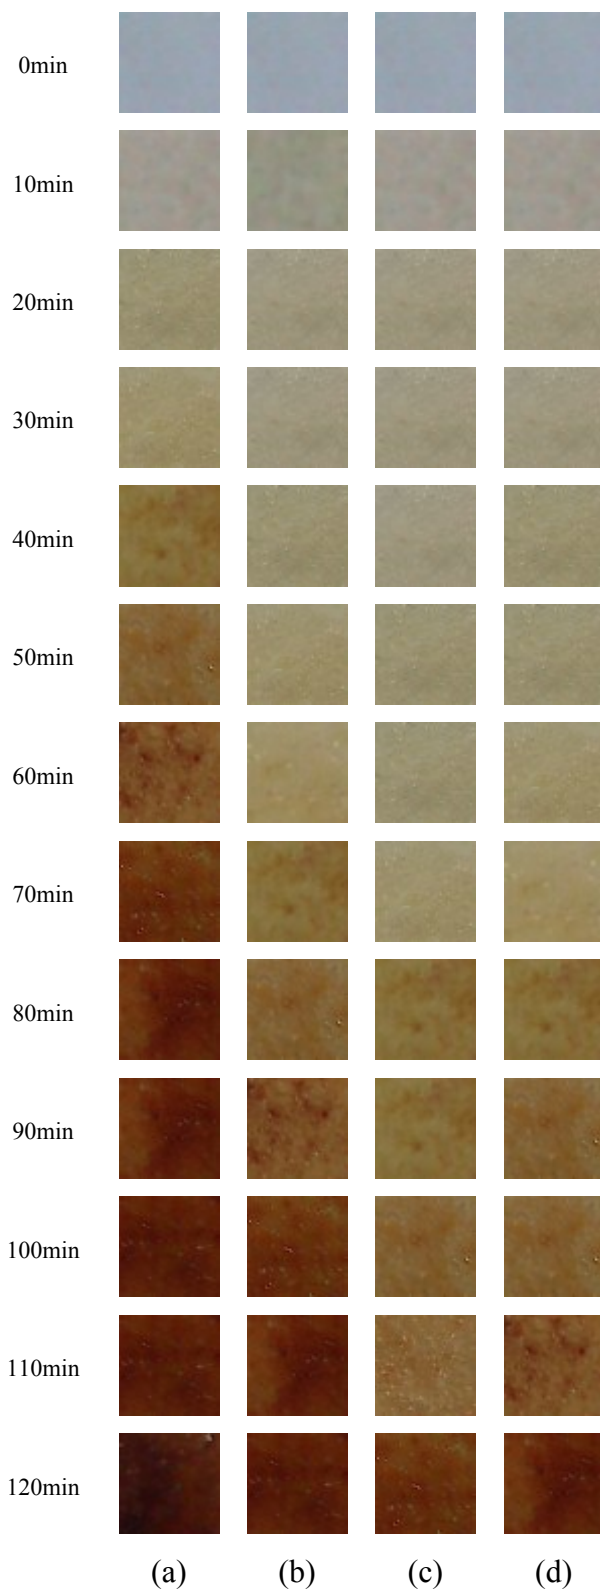

Figure S1. Effects of different amounts of hydrocalumites (sample 2) on the thermal stability of PVC composites.  
 (a) 2.0 phr; (b) 3.0 phr; (c) 4.0 phr; (d) 5.0 phr
